# Supplementary material
Source: PubMed Central journal article supplement (PMC5411508)
Supplement: AEM.00035-17_zam999117823s1.pdf [file AEM.00035-17_zam999117823s1.pdf]

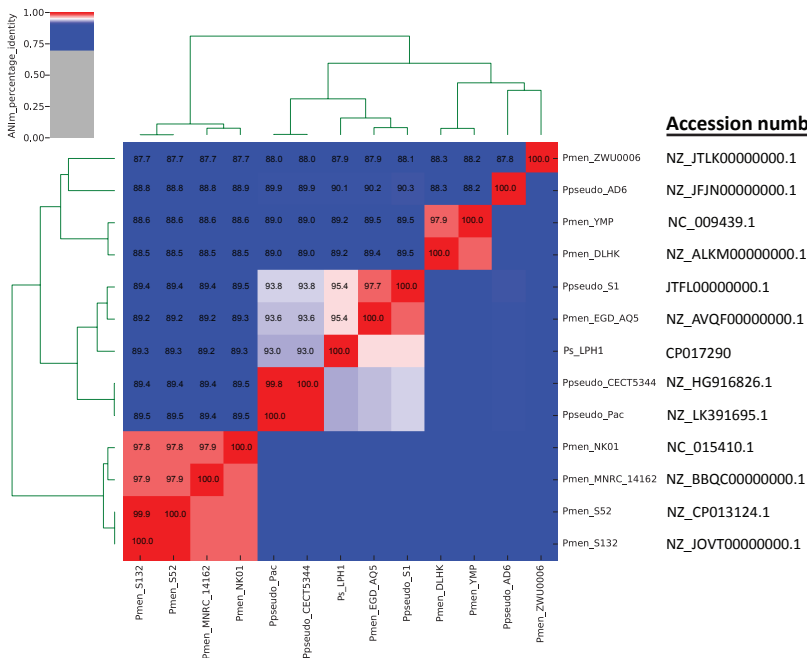

**Fig. S1. *Pseudomonas* species comparative genomics.** Average Nucleotide Identity (ANI) analysis and clustering were performed using PyANI (Richter M & Rossello-Mora R, PNAS 2009, 106 (45): 19126-31, and <https://github.com/widowquinn/pyani>) of *Pseudomonas* isolate LPH1 and twelve closely related *Pseudomonas* species. Ppseudo, *Pseudomonas pseudoalcaligenes*; Ps\_LPH1, *Pseudomonas* isolate described in this paper; Pmen, *Pseudomonas mendocina*.
